# Supplementary material
Source: ML conference proceedings conference paper supplement (https://proceedings.neurips.cc/paper_files/paper/2018/hash/812b4ba287f5ee0bc9d43bbf5bbe87fb-Abstract.html)
Supplement: Supplementary file [file 812b4ba287f5ee0bc9d43bbf5bbe87fb-Supplemental.zip]

## Supplementary Material

### A Claim 1

#### A.1 Proof for Claim 1

*Proof.* We first show that for any  $\gamma_0 > 0$ , any norm  $\|\cdot\|_*$ , and any  $C_0 > 0$ , there exists a function  $f_{\tilde{\mathbf{V}}}$  satisfying  $f_{\tilde{\mathbf{V}}} \equiv C_0$  and  $\prod_{i=1}^{k+1} \|\tilde{\mathbf{V}}_i^T\|_* \leq \gamma_0$ . First assume that  $\|(1, 0, \dots, 0)\|_* = a_0$ . Note that  $a_0 > 0$  by the definition of the norm. To prove this, we could set an arbitrary  $\tilde{\mathbf{V}}_1$  satisfying that  $\|\tilde{\mathbf{V}}_1^T\|_* = \frac{\gamma_0}{a_0 C_0}$ , the arbitrary  $\tilde{\mathbf{V}}_i$ s satisfying that  $\|\tilde{\mathbf{V}}_i\|_* = 1$  for  $i = 2, \dots, k$ , and the output layer as  $T_{k+1}(\mathbf{u}) = C_0$ . Then  $f_{\tilde{\mathbf{V}}} \equiv C_0$ , and

$$\prod_{i=1}^{k+1} \|\tilde{\mathbf{V}}_i\|_* \leq \frac{\gamma_0}{a_0 C_0} * 1^{k-1} * a_0 C_0 = \gamma_0.$$

Then

$$\begin{aligned} \hat{\mathfrak{R}}_S(\mathcal{N}_{\gamma_* \leq \gamma}^{k, \mathbf{d}}) &= \mathbb{E}_\epsilon \left[ \sup_{f \in \mathcal{F}} \left( \frac{1}{n} \sum_{i=1}^n \epsilon_i f(z_i) \right) \right] \\ &\geq \mathbb{P}(\sum_{i=1}^n \epsilon_i \neq 0) \mathbb{E}_\epsilon \left[ \sup_{f \in \mathcal{N}_{\gamma_* \leq \gamma}^{k, \mathbf{d}}} \left( \frac{1}{n} \sum_{i=1}^n \epsilon_i f(z_i) \right) \middle| \sum_{i=1}^n \epsilon_i \neq 0 \right] \\ &\geq \frac{1}{2} \mathbb{E}_\epsilon \left[ \sup_{f \in \mathcal{N}_{\gamma_* \leq \gamma}^{k, \mathbf{d}}} \left( \frac{1}{n} \sum_{i=1}^n \epsilon_i f(z_i) \right) \middle| \sum_{i=1}^n \epsilon_i \neq 0 \right] \\ &\geq \frac{1}{2} \mathbb{E}_\epsilon \left[ \sup_{C_0 > 0} \left( \frac{1}{n} \sum_{i=1}^n \epsilon_i \text{sgn}(\sum_{i=1}^n \epsilon_i) C_0 \right) \middle| \sum_{i=1}^n \epsilon_i \neq 0 \right] \\ &= \infty, \end{aligned} \tag{7a}$$

where the step in Equation (7a) follows from  $\mathbb{P}(\sum_{i=1}^n \epsilon_i \neq 0) = 1$  when  $n$  is an odd number, and  $\mathbb{P}(\sum_{i=1}^n \epsilon_i \neq 0) = 1 - \frac{1}{2} \mathbb{P}(\sum_{i=2}^n \epsilon_i = 1) - \frac{1}{2} \mathbb{P}(\sum_{i=2}^n \epsilon_i = -1) \geq \frac{1}{2}$  when  $n$  is an even number.  $\square$

### B Theorem 1

*Proof.* For Part (a), if any  $\|T_i\|_{p,q} = 0$ , then  $f = 0 \in \mathcal{N}_{p,q,c,c_o}^{k, \mathbf{d}}$ . Otherwise, we will prove by induction on depth  $k + 1$ . It is trivial when  $k = 0$ .

When  $k = 1$ , we rescale the first hidden layer by

$$s = c / \|T_1\|_{p,q}.$$

Equivalently, define the new affine transformation  $T_1^*$  by

$$\mathbf{B}_1^* = s\mathbf{B}_1, \mathbf{W}_1^* = s\mathbf{W}_1,$$

such that  $\|T_1^*\|_{p,q} = c$ . For the output layer, we define

$$\mathbf{W}_2^* = \mathbf{W}_2 \|T_1^*\|_{p,q} / c, \mathbf{B}_2^* = \mathbf{B}_2.$$

Then  $T_2^*(\mathbf{u}) = (\mathbf{W}_2^*)^T \mathbf{u} + \mathbf{B}_2^*$  satisfies  $\|T_2^*(\mathbf{u})\|_{p,q} \leq c_o$ , as  $s \geq 1$ . What's more  $f(\mathbf{x}) = T_2^* \circ \sigma \circ T_1^* \circ \mathbf{x} \in \mathcal{N}_{p,q,c,c_o}^{1, \mathbf{d}}$ .

Assume the result holds when  $k < K$ . Then when  $k = K$ , consider  $f(\mathbf{x}) = T_{K+1} \circ \sigma \circ T_K \circ \dots \circ T_1^* \circ \mathbf{x}$ . Its  $K$ th hidden layer

$$f_K(\mathbf{x}) \in \mathcal{N}_{p,q,c,c}^{K-1, \mathbf{d}_K}$$

by induction assumption, where  $\mathbf{d}_K = (d_0, d_1 \dots, d_K)$ . In other words, there exists a series of affine transformations  $\{T_i^*\}_{i=1, \dots, K}$ , such that

$$f_K(\mathbf{x}) = T_K^* \circ \sigma \circ T_{K-1}^* \circ \dots \circ \sigma \circ T_1^* \circ \mathbf{x},$$

$\|T_i^*\| = c$  for  $i = 1, \dots, K-1$ , and  $\|T_K^*\| \leq c$ . Thus

$$f(\mathbf{x}) = T_{K+1} \circ \sigma \circ T_K^* \circ \sigma \circ T_{K-1}^* \circ \dots \circ \sigma \circ T_1^* \circ \mathbf{x}.$$

We rescale  $T_K^*$  by  $s = c / \|T_K^*\|_{p,q}$ . Equivalently, define a new affine transformation  $T_K^{**}$  by  $T_K^{**} = sT_K^*$ , such that  $\|T_K^{**}\|_{p,q} = c$ . For the output layer, we define

$$\mathbf{W}_{K+1}^* = \mathbf{W}_{K+1}/s, \mathbf{B}_{K+1}^* = \mathbf{B}_{K+1}.$$

Then  $T_{K+1}^*(\mathbf{u}) = (\mathbf{W}_{K+1}^*)^T \mathbf{u} + \mathbf{B}_{K+1}^*$  satisfies  $\|T_{K+1}^*(\mathbf{u})\|_{p,q} \leq c_o$ , as  $s \geq 1$ . Thus  $f \in \mathcal{N}_{p,q,c,c_o}^{K,\mathbf{d}}$ .

For Part (b), it is a direct conclusion from Part (a) that  $\mathcal{N}_{p,q,c_1,c_o}^{k,\mathbf{d}} \subseteq \mathcal{N}_{p,q,c_2,c_o}^{k,\mathbf{d}}$  if  $c_1 \leq c_2$ , and  $\mathcal{N}_{p,q,c,c_o}^{k,\mathbf{d}} \subseteq \mathcal{N}_{p,q,c,c_o^2}^{k,\mathbf{d}}$  if  $c_o^1 \leq c_o^2$ . If  $g \in \mathcal{N}_{p,q,c,1}^{k,\mathbf{d}}$ , then by definition,  $c_o g \in \mathcal{N}_{p,q,c,c_o}^{k,\mathbf{d}}$ .

For Part (c), note that  $\|\cdot\|_{p_1} \geq \|\cdot\|_{p_2}$  when  $p_1 \leq p_2$ , hence

$$\{\mathbf{v} : \|\mathbf{v}\|_{p_1} \leq C\} \subseteq \{\mathbf{v} : \|\mathbf{v}\|_{p_2} \leq C\}.$$

Then the first line of Part (c) follows from the observation above as well as the conclusion of Part (a). As for the second line, for any  $h \in \mathcal{N}_{p,\infty,c,c_o}^{k,\mathbf{d}}$ , we could write

$$h = T_{k+1} \circ \sigma \circ T_k \circ \dots \circ \sigma \circ T_1 \circ \mathbf{x},$$

where  $T_i(\mathbf{u}) : \mathbb{R}^{d_{i-1}} \rightarrow \mathbb{R}^{d_i} = \mathbf{W}_i^T \mathbf{u} + \mathbf{B}_i$ , satisfies that  $\|T_i\|_{p,\infty} = c$  for  $i = 1, \dots, k$ , and  $\|T_{k+1}\|_{p,\infty} \leq c_o$ . Note that

$$\|T_i\|_{p,\infty} \leq \|T_i\|_{p,q} \leq d_i^{\frac{1}{q}} \|T_i\|_{p,\infty} \leq \max(\mathbf{d}_{-1})^{\frac{1}{q}} \|T_i\|_{p,\infty}$$

for  $i = 1, 2, \dots, k$ , and  $\|T_{k+1}\|_{p,q} \leq d_{k+1}^{\frac{1}{q}} \|T_{k+1}\|_{p,\infty}$ . Thus we get the desired result by Part (a).

Regarding Part (d), we first show the result holds when  $k_1 = k_2$ . For any  $g \in \mathcal{N}_{p,q,c,c_o}^{k_1,\mathbf{d}^1}$ , we could add  $d_i^2 - d_i^1$  neurons in each hidden layer with no connection to other neurons, thus not increasing the norm of each layer. Note that this neural network belongs to  $\mathcal{N}_{p,q,c,c_o}^{k_1,\mathbf{d}^2}$ .

For the general case when  $k_1 \leq k_2$ , we could add  $k_2 - k_1$  identity layers of width 1 with their  $L_{p,q}$  norm equals  $1 \leq c$ . Then the new neural network represents the same function as the original one. Combining the conclusion of Part (a), we have

$$\mathcal{N}_{p,q,c,c_o}^{k_1,\mathbf{d}^1} \subseteq \mathcal{N}_{p,q,c,c_o}^{k_2,\tilde{\mathbf{d}}^1},$$

where  $\tilde{d}_i^1 = d_i^1$  for  $i = 0, 1, \dots, k_1$ , and  $\tilde{d}_i^1 = d_{k_1+1}^1$  for  $i = k_1 + 1, \dots, k_2 + 1$ . Note that  $\mathcal{N}_{p,q,c,c_o}^{k_2,\tilde{\mathbf{d}}^1} \subseteq \mathcal{N}_{p,q,c,c_o}^{k_2,\mathbf{d}^2}$  by the case when  $k_1 = k_2$ . Thus we get what is expected.  $\square$

## C Rademacher Complexities

Rademacher complexity is commonly used to measure the complexity of a hypothesis class with respect to a probability distribution or a sample and analyze generalization bounds [6].

**Rademacher Complexities.** The *empirical Rademacher complexity* of the hypothesis class  $\mathcal{F}$  with respect to a data set  $S = \{z_1 \dots z_n\}$  is defined as:

$$\hat{\mathfrak{R}}_S(\mathcal{F}) = \mathbb{E}_\epsilon \left[ \sup_{f \in \mathcal{F}} \left( \frac{1}{n} \sum_{i=1}^n \epsilon_i f(z_i) \right) \right]$$

where  $\epsilon = \{\epsilon_1 \dots \epsilon_n\}$  are  $n$  independent Rademacher random variables. The *Rademacher complexity* of the hypothesis class  $\mathcal{F}$  with respect to  $n$  samples is defined as:

$$\mathfrak{R}_n(\mathcal{F}) = \mathbb{E}_{S \sim \mathcal{D}^n} \left[ \widehat{\mathfrak{R}}_S(\mathcal{F}) \right]$$

We list the following technical lemmas that will be used later in our own proofs for reference.

**Lemma 2.** *Let  $\mathcal{F}$  and  $\mathcal{G}$  be two hypothesis classes and  $a \in \mathbb{R}$  be a constant. Define the shorthand notation:*

$$\begin{aligned} a\mathcal{F} &= \{af \mid f \in \mathcal{F}\} \\ \mathcal{F} + \mathcal{G} &= \{f + g \mid f \in \mathcal{F} \text{ and } g \in \mathcal{G}\} \end{aligned}$$

We have:

$$\begin{aligned} \text{i. } \widehat{\mathfrak{R}}_S(a\mathcal{F}) &= |a| \widehat{\mathfrak{R}}_S(\mathcal{F}) \\ \text{ii. } \mathcal{F} \subseteq \mathcal{G} &\Rightarrow \widehat{\mathfrak{R}}_S(\mathcal{F}) \leq \widehat{\mathfrak{R}}_S(\mathcal{G}) \\ \text{iii. } \widehat{\mathfrak{R}}_S(\mathcal{F} + \mathcal{G}) &\leq \widehat{\mathfrak{R}}_S(\mathcal{F}) + \widehat{\mathfrak{R}}_S(\mathcal{G}) \end{aligned}$$

*Proof.* By definition. □

**Lemma 3.** [15] *Assume that the hypothesis class  $\mathcal{F} \subseteq \{f \mid f : \mathcal{X} \rightarrow \mathbb{R}\}$  and  $\mathbf{x}_1, \dots, \mathbf{x}_n \in \mathcal{X}$ . Let  $G : \mathbb{R} \rightarrow \mathbb{R}$  be convex and increasing. Assume that the function  $\phi : \mathbb{R} \rightarrow \mathbb{R}$  is  $L$ -Lipschitz continuous and satisfies that  $\phi(0) = 0$ . We have:*

$$\mathbb{E}_\epsilon \left[ G \left( \sup_{f \in \mathcal{F}} \left( \frac{1}{n} \sum_{i=1}^n \epsilon_i \phi(f(\mathbf{x}_i)) \right) \right) \right] \leq \mathbb{E}_\epsilon \left[ G \left( L \sup_{f \in \mathcal{F}} \left( \frac{1}{n} \sum_{i=1}^n \epsilon_i f(\mathbf{x}_i) \right) \right) \right]$$

**Lemma 4** (Massart's finite lemma). *Let  $\mathcal{A}$  be some finite subset of  $\mathbb{R}^m$  and  $\epsilon_1, \epsilon_2, \dots, \epsilon_m$  be independent Rademacher random variables. Let  $r = \sup_{\mathbf{a} \in \mathcal{A}} \|\mathbf{a}\|_2$ , then we have*

$$\mathbb{E} \left[ \sup_{\mathbf{a} \in \mathcal{A}} \frac{1}{m} \sum_{i=1}^m \epsilon_i a_i \right] = \frac{r \sqrt{2 \log |\mathcal{A}|}}{m}$$

The theorem below is a more general version of [17, Theorem 3.1], where they assume  $a = 0$ , of which the proof is very similar to the original one.

**Theorem 3.** *Let  $z$  be a random variable of support  $\mathcal{Z}$  and distribution  $\mathcal{D}$ . Let  $S = \{z_1 \dots z_n\}$  be a data set of  $n$  i.i.d. samples drawn from  $\mathcal{D}$ . Let  $\mathcal{F}$  be a hypothesis class satisfying  $\mathcal{F} \subseteq \{f \mid f : \mathcal{Z} \rightarrow [a, a+1]\}$ . Fix  $\delta \in (0, 1)$ . With probability at least  $1 - \delta$  over the choice of  $S$ , the following holds for all  $h \in \mathcal{F}$ :*

$$\mathbb{E}_{\mathcal{D}}[h] \leq \widehat{\mathbb{E}}_S[h] + 2\mathfrak{R}_n(\mathcal{F}) + \sqrt{\frac{\log(1/\delta)}{2n}}$$

## D Propositions 1, 2, 3

In this section, define  $\sigma(u) = uI\{u > 0\}$  for  $u \in \mathbb{R}$  and  $\sigma \circ \mathbf{z} = (\sigma(z_1), \dots, \sigma(z_m))$  for any vector  $\mathbf{z} \in \mathbb{R}^m$ .

### D.1 Proof for Proposition 1

*Proof.* By Theorem 1,  $\mathcal{N}_{1,q,c,c_o}^{k,\mathbf{d}} \subseteq \mathcal{N}_{1,\infty,c,c_o}^{k,\mathbf{d}}$ . Therefore it is sufficient to show that the result holds for  $\mathcal{N}_{1,\infty,c,c_o}^{k,\mathbf{d}}$ .

In order to get the first term inside the minimum operator, we will show that  $\mathcal{N}_{1,\infty,c,c_o}^{k,\mathbf{d}}$  belongs to some DNN class with only bias neuron in the input layer. Then the result follows from Theorem

2[10]. Define  $\mathcal{N}_{\gamma_{1,\infty} \leq \gamma}^{k, \mathbf{d}^+}$  as a function class that contains all functions representable by  $f = T_{k+1} \circ \sigma \circ T_k \circ \dots \circ \sigma \circ T_1 \circ \mathbf{x}$  satisfying that

$$\gamma_{1,\infty} = \prod_{i=1}^{k+1} \|\mathbf{W}_i\|_{1,\infty} \leq \gamma,$$

where  $\mathbf{d}^+ = (m_1 + 1, d_1 + 1, d_2 + 1, \dots, d_k + 1, 1)$ ,  $T_i(\mathbf{u}) = \mathbf{W}_i^T \mathbf{u}$ , and  $\mathbf{W}_i \in \mathbb{R}^{d_{i-1}^+ \times d_i^+}$  for  $i = 1, \dots, k+1$ .

The next step is to prove that  $\mathcal{N}_{1,\infty,c,c_o}^{k, \mathbf{d}^+} \subseteq \mathcal{N}_{\gamma_{1,\infty} \leq \max(1,c)^k c_o}^{k, \mathbf{d}^+}$ . Following the notations in Section 2, for any  $\tilde{\mathbf{V}}_i \in \mathbb{R}^{(d_{i-1}+1) \times d_i}$  satisfying that  $\|\tilde{\mathbf{V}}_i\|_{1,\infty} = c$ , we have  $\|\mathbf{V}_i\|_{1,\infty} = \max(1, c)$ , where  $\mathbf{V}_i = (\mathbf{e}_{1i}, \tilde{\mathbf{V}}_i)$  and  $\mathbf{e}_{1i} = (1, 0, \dots, 0)^T \in \mathbb{R}^{d_{i-1}+1}$ . Equivalently, the bias neuron in the  $i$ th hidden layer can be regarded as a hidden neuron computed from the  $i-1$ th layer by  $\sigma(e_{1i}^T f_{i-1}^*(\mathbf{x})) = 1$ , while the new affine transformation could be parameterized by  $\mathbf{V}_i$ , such that  $\|\mathbf{V}_i\|_{1,\infty} = \max(1, c)$ .

Finally, we get the first term inside the minimum operator by applying Theorem 2[10], and the second term is the bound of Proposition 2 when  $p = 1$ .  $\square$

## D.2 Proposition 2

We first introduce two technical lemmas, which will be used later to prove Proposition 2.

**Lemma 5.**  $\mathbf{z}_i \in \mathbb{R}^{m_1}$ ,  $\|\mathbf{z}_i\|_\infty \leq 1$  for  $i = 1, 2, \dots, n$ . For  $p \in (1, 2]$ ,

$$\frac{1}{n} \mathbb{E} \left\| \sum_{i=1}^n \epsilon_i \mathbf{z}_i \right\|_{p^*} \leq \frac{m_1^{\frac{1}{p^*}}}{\sqrt{n}} \min \left( (\sqrt{p^* - 1}, \sqrt{2 \log(2m_1)}) \right),$$

and for  $p = 1 \cup (2, \infty)$ ,

$$\frac{1}{n} \mathbb{E} \left\| \sum_{i=1}^n \epsilon_i \mathbf{z}_i \right\|_{p^*} \leq \sqrt{\frac{2 \log(2m_1)}{n}} m_1^{\frac{1}{p^*}}.$$

**Lemma 6.**  $\forall p, q \geq 1$ ,  $s_1, s_2 \geq 1$ ,  $\epsilon \in \{-1, +1\}^n$  and for all functions  $g : \mathbb{R}^{m_1} \rightarrow \mathbb{R}^{s_1}$ , we have

$$\sup_{\mathbf{V} \in \mathbb{R}^{s_1 \times s_2}} \frac{1}{\|\mathbf{V}\|_{p,q}} \left\| \sum_{i=1}^n \epsilon_i \sigma \left( \mathbf{V}^T g(\mathbf{x}_i) \right) \right\|_{p^*} = s_2^{\lceil \frac{1}{p^*} - \frac{1}{q} \rceil +} \sup_{\mathbf{v} \in \mathbb{R}^{s_1}} \frac{1}{\|\mathbf{v}\|_p} \left\| \sum_{i=1}^n \epsilon_i \sigma \left( \langle \mathbf{v}, g(\mathbf{x}_i) \rangle \right) \right\|_{p^*},$$

where  $\frac{1}{p} + \frac{1}{p^*} = 1$ .

## D.3 Proof of Proposition 2

*Proof.* The proof has two main steps.

Fixing the sample  $S$ ,  $p \geq 1$  and the architecture of the DNN, define a series of random variables  $\{Z_0, Z_1, \dots, Z_k\}$  as

$$Z_0 = \left\| \sum_{i=1}^n \epsilon_i \mathbf{x}_i \right\|_{p^*}$$

and

$$Z_j = \sup_{f \in \mathcal{N}_{p,q,c,c_o}^{k, \mathbf{d}^+}} \left\| \sum_{i=1}^n \epsilon_i \sigma \circ f_j(\mathbf{x}_i) \right\|_{p^*},$$

for  $j = 1, \dots, k$ , where  $\{\epsilon_1, \dots, \epsilon_n\}$  are  $n$  independent Rademacher random variables, and  $f_j$  denotes the  $j$ th hidden layer of the WN-DNN  $f$ .

In the first step, we prove by induction that for  $j = 1, \dots, k$  and any  $t \in \mathbb{R}$

$$\mathbb{E}_\epsilon \exp(t Z_j) \leq 4^j \exp \left( \frac{t^2 n s_j^2}{2} + t c^j \prod_{i=1}^j d_i^{\lceil \frac{1}{p^*} - \frac{1}{q} \rceil +} A_{m_1, S}^p \right),$$

where

$$s_j = \sum_{i=2}^j c^{j-i+1} \prod_{l=i}^j d_l^{\lceil \frac{1}{p^*} - \frac{1}{q} \rceil +} + (m_1^{\frac{1}{p^*}} + 1) c^j \prod_{l=1}^j d_l^{\lceil \frac{1}{p^*} - \frac{1}{q} \rceil +}$$

and

$$A_{m_1, S}^p = \begin{cases} \sqrt{n} \min \left( (\sqrt{p^* - 1} m_1^{\frac{1}{p^*}}, \sqrt{2 \log(2m_1)} m_1^{\frac{1}{p^*}} \right) & \text{if } p \in (1, 2] \\ \sqrt{2n \log(2m_1)} m_1^{\frac{1}{p^*}} & \text{if } p \in 1 \cup (2, \infty) \end{cases}$$

Note that  $s_{j+1} = c d_j^{\lceil \frac{1}{p^*} - \frac{1}{q} \rceil +} (s_j + 1)$ .

When  $j = 0$ , by Lemma 5,  $E_\epsilon Z_0 \leq A_{m_1, S}^p$ . Note that  $Z_0$  is a deterministic function of the i.i.d. random variables  $\epsilon_1, \dots, \epsilon_n$ , satisfying that

$$|Z_0(\epsilon_1, \dots, \epsilon_i, \dots, \epsilon_n) - Z_0(\epsilon_1, \dots, -\epsilon_i, \dots, \epsilon_n)| \leq 2 \max \|\mathbf{x}_i\|_{p^*} \leq 2m_1^{\frac{1}{p^*}}$$

by Minkowski inequality. By the proof of Theorem 6.2 [7],  $Z_0$  satisfies that  $\log \mathbb{E}_\epsilon \exp(t(Z_0 - E_\epsilon Z_0)) \leq t^2 n m_1^{\frac{2}{p^*}} / 2$ , thus

$$\begin{aligned} \mathbb{E}_\epsilon \exp(tZ_0) &= \mathbb{E}_\epsilon \exp(t(Z_0 - E_\epsilon Z_0)) * \exp(tE_\epsilon Z_0) \\ &\leq \exp\left(\frac{t^2 n m_1^{\frac{2}{p^*}}}{2} + t A_{m_1, S}^p\right) \end{aligned}$$

for any  $t \in \mathbb{R}$ .

For the case when  $j = 1, \dots, k$ ,

$$\begin{aligned} \mathbb{E}_\epsilon \exp(tZ_j) &= \mathbb{E}_\epsilon \exp\left(t \sup_{\|\tilde{\mathbf{V}}_j\|_{p, q} \leq c} \left\| \sum_{i=1}^n \epsilon_i \sigma \circ (\tilde{\mathbf{V}}_j^T \sigma \circ f_{j-1}^*(\mathbf{x}_i)) \right\|_{p^*}\right) \\ &= \mathbb{E}_\epsilon \exp\left(t c d_j^{\lceil \frac{1}{p^*} - \frac{1}{q} \rceil +} \sup_{\mathbf{v}, f} \left\| \sum_{i=1}^n \epsilon_i \sigma(\mathbf{v}^T \sigma \circ f_{j-1}^*(\mathbf{x}_i)) / \|\mathbf{v}\|_p \right\|_{p^*}\right) \end{aligned} \quad (8a)$$

$$\leq 2 \mathbb{E}_\epsilon \exp\left(t c d_j^{\lceil \frac{1}{p^*} - \frac{1}{q} \rceil +} \sup_{\mathbf{v}, f} \sum_{i=1}^n \epsilon_i \sigma(\mathbf{v}^T \sigma \circ f_{j-1}^*(\mathbf{x}_i)) / \|\mathbf{v}\|_p\right) \quad (8b)$$

$$\leq 2 \mathbb{E}_\epsilon \exp\left(t c d_j^{\lceil \frac{1}{p^*} - \frac{1}{q} \rceil +} \sup_{\mathbf{v}, f} \mathbf{v}^T \sum_{i=1}^n \epsilon_i \sigma \circ f_{j-1}^*(\mathbf{x}_i) / \|\mathbf{v}\|_p\right) \quad (8c)$$

$$\leq 2 \mathbb{E}_\epsilon \exp\left(t c d_j^{\lceil \frac{1}{p^*} - \frac{1}{q} \rceil +} \sup_f \left\| \sum_{i=1}^n \epsilon_i (1, \sigma \circ f_{j-1}(\mathbf{x}_i)) \right\|_{p^*}\right)$$

$$\leq 2 \mathbb{E}_\epsilon \exp\left(t c d_j^{\lceil \frac{1}{p^*} - \frac{1}{q} \rceil +} \left( \left| \sum_{i=1}^n \epsilon_i \right| + \sup_f \left\| \sum_{i=1}^n \epsilon_i \sigma \circ f_{j-1}(\mathbf{x}_i) \right\|_{p^*} \right)\right)$$

$$\leq 2 \left[ \mathbb{E}_\epsilon \exp\left(r_j t c d_j^{\lceil \frac{1}{p^*} - \frac{1}{q} \rceil +} \left| \sum_{i=1}^n \epsilon_i \right| \right) \right]^{\frac{1}{r_j}} \left[ \mathbb{E}_\epsilon \exp\left(r_j^* t c d_j^{\lceil \frac{1}{p^*} - \frac{1}{q} \rceil +} \sup_f \left\| \sum_{i=1}^n \epsilon_i \sigma \circ f_{j-1}(\mathbf{x}_i) \right\|_{p^*}\right) \right]^{\frac{1}{r_j^*}} \quad (8d)$$

$$\leq 2 \left[ 2 \mathbb{E}_\epsilon \exp\left(r_j t c d_j^{\lceil \frac{1}{p^*} - \frac{1}{q} \rceil +} \sum_{i=1}^n \epsilon_i \right) \right]^{\frac{1}{r_j}} \left[ \mathbb{E}_\epsilon \exp\left(r_j^* t c d_j^{\lceil \frac{1}{p^*} - \frac{1}{q} \rceil +} Z_{j-1}\right) \right]^{\frac{1}{r_j^*}}, \quad (8e)$$

$$\leq 4^{1 + \frac{j-1}{r_j}} \exp\left(\frac{nt^2 c^2 d_j^{2\lceil \frac{1}{p^*} - \frac{1}{q} \rceil +} (1 + s_{j-1})^2}{2} + t c^j \prod_{i=1}^j d_i^{\lceil \frac{1}{p^*} - \frac{1}{q} \rceil +} A_{m_1, S}^p\right)$$

$$\leq 4^j \exp \left( \frac{nt^2 s_j^2}{2} + tc^j \prod_{i=1}^j d_i^{\lceil \frac{1}{p^*} - \frac{1}{q} \rceil +} A_{m_1, S}^p \right)$$

The step in Equation (8a) follows from Lemma 6. The step in Equation (8b) follows from the observation that

$$\begin{aligned} \mathbb{E}_\epsilon \exp \left( \sup_{\mathbf{v}} \left| \sum_{i=1}^n \epsilon_i \frac{\sigma(\mathbf{v}^T f_{j-1}^*(\mathbf{x}_i))}{\|\mathbf{v}\|_p} \right| \right) &\leq \mathbb{E}_\epsilon \exp \left( \sup_{\mathbf{v}} \sum_{i=1}^n \epsilon_i \frac{\sigma(\mathbf{v}^T f_{j-1}^*(\mathbf{x}_i))}{\|\mathbf{v}\|_p} \right) + \\ \mathbb{E}_\epsilon \exp \left( \sup_{\mathbf{v}} \sum_{i=1}^n (-\epsilon_i) \frac{\sigma(\mathbf{v}^T f_{j-1}^*(\mathbf{x}_i))}{\|\mathbf{v}\|_p} \right) &= 2\mathbb{E}_\epsilon \exp \left( \sup_{\mathbf{v}} \sum_{i=1}^n \epsilon_i \frac{\sigma(\mathbf{v}^T f_{j-1}^*(\mathbf{x}_i))}{\|\mathbf{v}\|_p} \right). \end{aligned}$$

The step in Equation (8c) follows from Lemma 3. Note that Equation (8d) holds for any  $r > 1$  and  $r^* = \frac{r}{r-1}$  by Hölder's inequality  $\mathbb{E}(|XY|) \leq \mathbb{E}(|X|^r)^{\frac{1}{r}} \mathbb{E}(|Y|^{r^*})^{\frac{1}{r^*}}$ . An optimal  $r_j = s_{j-1} + 1$  is chosen in our case. The step in Equation (8e) follows from  $\mathbb{E}_\epsilon \exp(|X|) \leq \mathbb{E}_\epsilon \exp(X) + \mathbb{E}_\epsilon \exp(-X)$ .

Note that  $\sum_{i=1}^n \epsilon_i$  is also a deterministic function of the i.i.d. random variables  $\epsilon_1, \dots, \epsilon_n$ , satisfying

that  $\mathbb{E}_\epsilon \sum_{i=1}^n \epsilon_i = 0$  and

$$|\sum_{i \neq j} \epsilon_i + \epsilon_j - (\sum_{i \neq j} \epsilon_i - \epsilon_j)| \leq 2.$$

Then by the proof of Theorem 6.2 [7],

$$\mathbb{E}_\epsilon \exp(t \sum_{i=1}^n \epsilon_i) \leq \exp(\frac{t^2 n}{2})$$

for any  $t \in \mathbb{R}$ . Then we get the desired result by choosing the optimal  $r_j$  while following the induction assumption.

The second step is based on the idea of [10] using Jensen's inequality. For any  $\lambda > 0$ ,

$$\begin{aligned} n\hat{\mathfrak{R}}_S(\mathcal{N}_{p,q,c,c_o}^k, \mathbf{d}) &= \mathbb{E}_\epsilon \left[ \sup_{f \in \mathcal{N}_{p,q,c,c_o}^k, \mathbf{d}} \left( \sum_{i=1}^n \epsilon_i f(\mathbf{x}_i) \right) \right] \\ &\leq \frac{1}{\lambda} \log \mathbb{E}_\epsilon \exp \left( \lambda \sup_{f \in \mathcal{N}_{p,q,c,c_o}^k, \mathbf{d}} \left( \sum_{i=1}^n \epsilon_i f(\mathbf{x}_i) \right) \right) \\ &\leq \frac{1}{\lambda} \log \mathbb{E}_\epsilon \exp \left( \lambda c_o \sup_{f \in \mathcal{N}_{p,q,c,c_o}^k, \mathbf{d}} \left\| \sum_{i=1}^n \epsilon_i (1, \sigma \circ f_k(\mathbf{x}_i)) \right\|_{p^*} \right) \\ &\leq \frac{1}{\lambda} \left[ (k+1) \log 4 + \frac{\lambda^2 c_o^2 n (s_k + 1)^2}{2} + \lambda A_{m_1, S}^p c_o c^k \prod_{i=1}^k d_i^{\lceil \frac{1}{p^*} - \frac{1}{q} \rceil +} \right] \quad (9a) \\ &= \frac{(k+1) \log 4}{\lambda} + \frac{\lambda c_o^2 n (s_k + 1)^2}{2} + c_o c^k \prod_{i=1}^k d_i^{\lceil \frac{1}{p^*} - \frac{1}{q} \rceil +} A_{m_1, S}^p, \end{aligned}$$

where the step in Equation (9a) is derived using a similar technique as in Equations (8a) to (8e). By choosing the optimal  $\lambda = \frac{\sqrt{(k+1) \log 16}}{c_o (s_k + 1) \sqrt{n}}$ , we have

$$\begin{aligned} \hat{\mathfrak{R}}_S(\mathcal{N}_{p,q,c}^k, \mathbf{d}) &\leq c_o \sqrt{\frac{(k+1) \log 16}{n}} \left( \sum_{i=2}^k c^{k-i+1} \prod_{l=i}^k d_l^{\lceil \frac{1}{p^*} - \frac{1}{q} \rceil +} + (m_1^{\frac{1}{p^*}} + 1) c^k \prod_{i=1}^k d_i^{\lceil \frac{1}{p^*} - \frac{1}{q} \rceil +} + 1 \right) + \\ &\quad \frac{1}{\sqrt{n}} c_o c^k \prod_{i=1}^k d_i^{\lceil \frac{1}{p^*} - \frac{1}{q} \rceil +} A_{m_1, S}^p \end{aligned}$$

□

#### D.4 Proof of Lemma 5

*Proof.* For  $p \in (1, 2]$ , or equivalently  $p^* \in [2, \infty)$ ,  $\|\cdot\|_{p^*}$  is  $2(p^* - 1)$ -strongly convex with respect to itself on  $\mathbb{R}^{m_1+1}$  [24] and  $\|\mathbf{z}_i\|_{p^*} \leq m_1^{\frac{1}{p^*}} \|\mathbf{z}_i\|_\infty$ , thus  $\frac{1}{n} \mathbb{E} \left\| \sum_{i=1}^n \epsilon_i \mathbf{z}_i \right\|_{p^*} \leq \sqrt{\frac{p^*-1}{n}} m_1^{\frac{1}{p^*}}$  [14].

For  $p \in [1, \infty)$  or equivalently  $p^* \in (1, \infty]$ , let  $\mathbf{z}[j] = (\mathbf{z}_1[j], \mathbf{z}_2[j], \dots, \mathbf{z}_n[j])^T$ , where  $\mathbf{z}_i[j]$  is the  $j$ th element of the vector  $\mathbf{z}_i \in \mathbb{R}^{m_1}$ .

$$\begin{aligned} \frac{1}{n} \mathbb{E} \left\| \sum_{i=1}^n \epsilon_i \mathbf{z}_i \right\|_{p^*} &\leq \frac{m_1^{\frac{1}{p^*}}}{n} \mathbb{E} \left\| \sum_{i=1}^n \epsilon_i \mathbf{z}_i \right\|_\infty \\ &\leq \frac{m_1^{\frac{1}{p^*}} \sqrt{2 \log(2m_1)}}{n} \sup_j \|\mathbf{z}[j]\|_2 \\ &\leq \frac{m_1^{\frac{1}{p^*}} \sqrt{2 \log(2m_1)}}{n} \sqrt{n} \sup_j \|\mathbf{z}[j]\|_\infty \\ &\leq \frac{m_1^{\frac{1}{p^*}} \sqrt{2 \log(2m_1)}}{\sqrt{n}} \end{aligned} \quad (10)$$

The step in Equation (10) follows from Lemma 4.  $\square$

#### D.5 Proof of Lemma 6

*Proof.* The proof is based on the ideas of [19, Lemma 17]

The right hand side (RHS) is always less than or equal to the left hand side (LHS), since given any vector  $\mathbf{v}$  we could create a corresponding matrix  $\mathbf{V}$  of which each row is  $\mathbf{v}$ .

Then we will show that (LHS) is always less than or equal to (RHS). Let  $\mathbf{V}[j]$  be the  $j$ th column of the matrix  $\mathbf{V}$ . We have  $\|\mathbf{V}\|_{p,p^*} \leq \|\mathbf{V}\|_{p,q}$  when  $q \leq p^*$  and by Hölder's inequality,  $\|\mathbf{V}\|_{p,p^*} \leq s_2^{\lceil \frac{1}{p^*} - \frac{1}{q} \rceil} \|\mathbf{V}\|_{p,q}$  when  $q > p^*$ . Thus

$$\begin{aligned} (\text{LHS}) &\leq \sup_{\mathbf{V} \in \mathbb{R}^{s_1 \times s_2}} \frac{s_2^{\lceil \frac{1}{p^*} - \frac{1}{q} \rceil_+}}{\|\mathbf{V}\|_{p,p^*}} \left\| \sum_{i=1}^n \epsilon_i \sigma \circ (\mathbf{V}^T g(\mathbf{x}_i)) \right\|_{p^*} \\ &= s_2^{\lceil \frac{1}{p^*} - \frac{1}{q} \rceil_+} \sup_{\mathbf{V} \in \mathbb{R}^{s_1 \times s_2}} \frac{1}{\|\mathbf{V}\|_{p,p^*}} \left( \sum_{j=1}^{s_2} \left| \sum_{i=1}^n \epsilon_i \sigma(\langle \mathbf{V}[j], g(\mathbf{x}_i) \rangle) \right|^{p^*} \right)^{1/p^*} \\ &\leq s_2^{\lceil \frac{1}{p^*} - \frac{1}{q} \rceil_+} \sup_{\mathbf{V} \in \mathbb{R}^{s_1 \times s_2}} \frac{1}{\|\mathbf{V}\|_{p,p^*}} \left( \sum_{j=1}^{s_2} \left( \|\mathbf{V}[j]\|_p \frac{(\text{RHS})}{s_2^{\lceil \frac{1}{p^*} - \frac{1}{q} \rceil_+}} \right)^{p^*} \right)^{1/p^*} \\ &= (\text{RHS}) \sup_{\mathbf{V} \in \mathbb{R}^{s_1 \times s_2}} \frac{1}{\|\mathbf{V}\|_{p,p^*}} \left( \sum_{j=1}^{s_2} (\|\mathbf{V}[j]\|_p)^{p^*} \right)^{1/p^*} \\ &= (\text{RHS}) \end{aligned}$$

$\square$

#### D.6 Proposition 3

*Proof.* Define  $\mathcal{N}_{\gamma_{p,q} \leq \gamma}^{k,d}$  as a function class that contains all functions representable by some neural network  $f = T_{k+1} \circ \sigma \circ T_k \circ \dots \circ \sigma \circ T_1 \circ \mathbf{x}$  satisfying that

$$\gamma_{p,q} = \prod_{i=1}^{k+1} \|\mathbf{W}_i\|_{p,q} \leq \gamma,$$

where  $\mathbf{d} = (m_1, d, \dots, d, 1)$ ,  $T_i(\mathbf{u}) = \mathbf{W}_i^T \mathbf{u}$ , and  $\mathbf{W}_i \in \mathbb{R}^{d_{i-1} \times d_i}$  for  $i = 1, \dots, k+1$ . In order to use the conclusion of [19, Theorem 3] for DNNs with no bias neuron, it is sufficient to show that

$$\mathcal{N}_{\gamma_{p,q} \leq \gamma}^{k, \mathbf{d}} \subseteq \mathcal{N}_{p,q,c,c_o}^{k, \mathbf{d}},$$

for any  $c, c_o$  satisfying that  $c^k c_o \geq \gamma$ .

If any  $\|T_i\|_{p,q} = 0$ , then  $f = 0 \in \mathcal{N}_{p,q,c,c_o}^{k, \mathbf{d}}$ . Otherwise, for any  $c, c_o$  satisfying that  $c^k c_o \geq \gamma \geq \prod_{i=1}^{k+1} \|T_i\|_{p,q}$ , we rescale each hidden layer by

$$s_i = c / \|T_i\|_{p,q},$$

that is, define  $T_i^*$  by  $\mathbf{B}_i^* = 0$  and  $\mathbf{W}_i^* = s_i \mathbf{W}_i$ , such that  $\|T_i^*\|_{p,q} = c$  and  $T_i^* = s_i T_i$ . Correspondingly, rescale the output layer by  $1 / \prod_{i=1}^k s_i$  and  $\|T_{k+1}^*\|_{p,q} \leq c_o$  as  $s_i \geq 1$ . Therefore,  $f \in \mathcal{N}_{p,q,c,c_o}^{k, \mathbf{d}}$ .  $\square$

## E Generalization Bounds

In this section, we provide a generalization bound that holds for any data distribution for regression as an extension of Section 3.

**The Regression Problem.** Assume that  $(\mathbf{x}_1, y_1), \dots, (\mathbf{x}_n, y_n)$  are  $n$  i.i.d samples on  $\mathcal{X} \times \mathcal{Y} \subseteq \mathbb{R}^{m_1} \times \mathbb{R}$ , satisfying that

$$y_i = f(\mathbf{x}_i) + \varepsilon_i, \quad (11)$$

where  $f : \mathcal{X} \rightarrow \mathcal{Y} \subseteq \mathbb{R}$  is an unknown function and  $\varepsilon_i$  an independent noise.

### E.1 Generalization Bounds

Assume that  $d : \mathcal{Y} \times \mathcal{Y} \rightarrow [0, 1]$  is a 1-Lipschitz function related to the prediction problem. For example, we could define  $d(y, y') = \min(1, (y - y')^2/2)$ . Let  $\mathbf{z} = (x, y) \in \mathcal{Z}$ , where  $\mathcal{Z} = \mathcal{X} \times \mathcal{Y}$ . Furthermore, for each  $f \in \mathcal{N}_{p,q,c,c_o}^{k, \mathbf{d}}$ , define a corresponding  $h_f$  such that  $h_f(\mathbf{z}) = d(y, f(x))$ . Let  $\mathcal{H}_{p,q,c,c_o}^{k, \mathbf{d}}$  be a hypothesis class satisfying

$$\mathcal{H}_{p,q,c,c_o}^{k, \mathbf{d}} = \bigcup_{f \in \mathcal{N}_{p,q,c,c_o}^{k, \mathbf{d}}} h_f.$$

For every  $h \in \mathcal{H}_{p,q,c,c_o}^{k, \mathbf{d}}$ , define the true and empirical risks as

$$\mathbb{E}_{\mathcal{D}}[h] = \mathbb{E}_{\mathbf{z} \sim \mathcal{D}}[h(\mathbf{z})], \quad \widehat{\mathbb{E}}_S[h] = \frac{1}{n} \sum_{i=1}^n h(\mathbf{z}_i).$$

**Theorem 4.** Let  $\mathbf{z} = (x, y)$  be a random variable of support  $\mathcal{Z}$  and distribution  $\mathcal{D}$ . Let  $S = \{\mathbf{z}_1 \dots \mathbf{z}_n\}$  be a dataset of  $n$  i.i.d. samples drawn from  $\mathcal{D}$ . Fix  $\delta \in (0, 1)$ ,  $k \in [0, \infty)$  and  $d_i \in \mathbb{N}_+$  for  $i = 1, \dots, k$ . With probability at least  $1 - \delta$  over the choice of  $S$ ,

(a) for  $p = 1$  and  $q \in [1, \infty]$ , we have  $\forall h \in \mathcal{H}_{1,q,c,c_o}^{k, \mathbf{d}}$ :

$$\begin{aligned} \mathbb{E}_{\mathcal{D}}[h] &\leq \widehat{\mathbb{E}}_S[h] + \sqrt{\frac{\log(1/\delta)}{2n}} + \frac{2c_o}{\sqrt{n}} * \min \left( 2 \max(1, c^k) \sqrt{k+2} + \log(m_1+1), \right. \\ &\quad \left. \sqrt{(k+1) \log 16} \sum_{i=0}^k c^i + c^k (\sqrt{2 \log(2m_1)} + \sqrt{(k+1) \log 16}) \right) \end{aligned}$$



(b) for  $p \in (1, 2]$  and  $q \in [1, \infty]$ , we have  $\forall h \in \mathcal{H}_{p,q,c,c_o}^{k,\mathbf{d}}$ :

$$\mathbb{E}_{\mathcal{D}}[h] \leq \widehat{\mathbb{E}}_S[h] + \sqrt{\frac{\log(1/\delta)}{2n}} + \frac{1}{\sqrt{n}} c_o c^k \prod_{i=1}^k d_i^{\lceil \frac{1}{p^*} - \frac{1}{q} \rceil +} \sqrt{2 \log(2m_1)} m_1^{\frac{1}{p^*}} + c_o \sqrt{\frac{(k+1) \log 16}{n}} \left( \sum_{i=1}^{k+1} c^{k-i+1} \prod_{l=i}^k d_l^{\lceil \frac{1}{p^*} - \frac{1}{q} \rceil +} + m_1^{\frac{1}{p^*}} c^k \prod_{i=1}^k d_i^{\lceil \frac{1}{p^*} - \frac{1}{q} \rceil +} \right).$$

(c) for  $p \in (2, \infty)$  and  $q \in [1, \infty]$ , we have  $\forall h \in \mathcal{H}_{p,q,c,c_o}^{k,\mathbf{d}}$ :

$$\mathbb{E}_{\mathcal{D}}[h] \leq \widehat{\mathbb{E}}_S[h] + \sqrt{\frac{\log(1/\delta)}{2n}} + \frac{1}{\sqrt{n}} c_o c^k \prod_{i=1}^k d_i^{\lceil \frac{1}{p^*} - \frac{1}{q} \rceil +} m_1^{\frac{1}{p^*}} \min \left( (\sqrt{p^*} - 1, \sqrt{2 \log(2m_1)}) \right) + c_o \sqrt{\frac{(k+1) \log 16}{n}} \left( \sum_{i=1}^{k+1} c^{k-i+1} \prod_{l=i}^k d_l^{\lceil \frac{1}{p^*} - \frac{1}{q} \rceil +} + m_1^{\frac{1}{p^*}} c^k \prod_{i=1}^k d_i^{\lceil \frac{1}{p^*} - \frac{1}{q} \rceil +} \right).$$

The corollary below gives a generalization bound for the  $L_{1,\infty}$  WN-DNNs.

**Corollary 1.** Let  $\mathbf{z} = (x, y)$  be a random variable of support  $\mathcal{Z}$  and distribution  $\mathcal{D}$ . Let  $S = \{\mathbf{z}_1 \dots \mathbf{z}_n\}$  be a dataset of  $n$  i.i.d. samples drawn from  $\mathcal{D}$ . Fix  $\delta \in (0, 1)$ ,  $k \in [0, \infty)$  and  $d_i \in \mathbb{N}_+$  for  $i = 1, \dots, k$ . Assume that  $c^k \leq a_0$  for some  $a_0 \geq 1$ . With probability at least  $1 - \delta$  over the choice of  $S$ , for any  $h \in \mathcal{H}_{p,q,c,c_o}^{k,\mathbf{d}}$ , we have:

$$\mathbb{E}_{\mathcal{D}}[h] \leq \widehat{\mathbb{E}}_S[h] + \sqrt{\frac{\log(1/\delta)}{2n}} + \frac{4c_o a_0}{\sqrt{n}} \sqrt{k + 2 + \log(m_1 + 1)}.$$

For instance, we could define  $c$  as  $1 + \frac{v_0}{k}$  with some constant  $v_0 \geq 0$  for ResNet [12], then  $c(k)^k \leq e^{v_0}$ . The case with  $v_0 = 0$  leads to a specific case where the normalization constant  $c = 1$ .

## E.2 Proof of Theorem 4

*Proof.* By applying Theorem 3, with probability at least  $1 - \delta$  over the choice of  $S$ ,  $\forall h \in \mathcal{H}_{p,q,c,c_o}^{k,\mathbf{d}}$ , we have:

$$\mathbb{E}_{\mathcal{D}}[h] - \widehat{\mathbb{E}}_S[h] \leq 2\mathfrak{R}_n(\mathcal{H}_{p,q,c,c_o}^{k,\mathbf{d}}) + \sqrt{\frac{\log(1/\delta)}{2n}}.$$

Thus it is equivalent to bound  $\mathfrak{R}_n(\mathcal{H}_{p,q,c,c_o}^{k,\mathbf{d}})$  in order to bound the absolute value of the generalization error. By Lemma 3, we have:

$$\mathfrak{R}_n(\mathcal{H}_{p,q,c,c_o}^{k,\mathbf{d}}) \leq \mathfrak{R}_n(\mathcal{N}_{p,q,c,c_o}^{k,\mathbf{d}}).$$

Finally, (a) follows from

$$\mathfrak{R}_n(\mathcal{N}_{p,q,c,c_o}^{k,\mathbf{d}}) \leq \sup_S \widehat{\mathfrak{R}}_S(\mathcal{N}_{p,q,c,c_o}^{k,\mathbf{d}})$$

and Proposition 1, while

$$\mathfrak{R}_n(\mathcal{N}_{p,q,c,c_o}^{k,\mathbf{d}}) = \mathfrak{R}_n(\mathcal{N}_{p,q,c,c_o}^{k,\mathbf{d}}) \leq \sup_S \widehat{\mathfrak{R}}_S(\mathcal{N}_{p,q,c,c_o}^{k,\mathbf{d}})$$

and Proposition 2 lead to (b) and (c).  $\square$

## F Theorem 2

### F.1 Proof of Lemma 1

*Proof.*  $\|(b_i, \mathbf{w}_i^T)\|_1 = 1$  implies  $\|(b_i, 2\mathbf{w}_i^T)\|_1 \leq 2$ , thus by Theorem 1 Part (b), it is sufficient to show that  $\mathbf{g}$  could be represented by some neural network in  $\mathcal{N}_{p,q,wid_k^{1/q},c_o}^{k,\mathbf{d}}$  if instead  $\|(b_i, 2\mathbf{w}_i^T)\|_1 =$

1. In addition, by Theorem 1 Parts (b), (c) and (d), it is equivalent to show that when  $\sum_{i=1}^r |c_i| = 1$ ,  $\mathbf{g}$  could be represented by some neural network in  $\mathcal{N}_{1,\infty,1,1}^{k,\mathbf{d}}$  where  $d_i \leq \lceil r/k \rceil + 2m_1 + 3$  for  $i = 1, \dots, k$ .

Decompose the shallow neural network as

$$g(\mathbf{x}) = \left( \sum_{i=1}^{r_1} c_i^+ \right) g_+(\mathbf{x}) - \left( \sum_{i=1}^{r_2} c_i^- \right) g_-(\mathbf{x}),$$

where

$$g_+(\mathbf{x}) = \sum_{i=1}^{r_1} c_i^+ \sigma((\mathbf{w}_i^+)^T \mathbf{x} + b_i^+) / \sum_{i=1}^{r_1} c_i^+, \quad g_-(\mathbf{x}) = \sum_{i=1}^{r_2} c_i^- \sigma((\mathbf{w}_i^-)^T \mathbf{x} + b_i^-) / \sum_{i=1}^{r_2} c_i^-$$

for some  $c_i^+, c_i^- > 0$ . Note that  $\|\alpha^T A^T\|_1 \leq 1$  if  $\alpha \in \mathbb{R}^s$  satisfies that  $\|\alpha\|_1 \leq 1$ , and  $A \in \mathbb{R}^{t \times s}$  satisfies that  $\|A\|_{1,\infty} \leq 1$ . Additionally

$$\sum_{i=1}^{r_1} c_i^+ + \sum_{i=1}^{r_2} c_i^- = \sum_{i=1}^r |c_i| = 1.$$

Thus it is sufficient to show that

$$(g_+(\mathbf{x}), g_-(\mathbf{x}))$$

could be represented by some neural network in  $\mathcal{N}_{1,\infty,1,1}^{k,\mathbf{d}}$ , where each hidden layer contains both  $\sigma \circ \mathbf{x}$  and  $\sigma \circ (-\mathbf{x})$ , while satisfying that  $d_i \leq \lceil r_1/k \rceil + \lceil r_2/k \rceil + 2m_1 + 2$  for  $i = 1, \dots, k$  and  $d_{k+1} = 2$ .

When  $k = 1$ , it is trivial.

When  $k = 2$ , we construct the first hidden layer consisting of  $\lceil r_1/2 \rceil + \lceil r_2/2 \rceil + 2m_1$  hidden neurons:

$$\{(\mathbf{w}_i^+)^T \mathbf{x} + b_i^+ : i = 1, \dots, \lceil r_1/2 \rceil\}, \{(\mathbf{w}_i^-)^T \mathbf{x} + b_i^- : i = 1, \dots, \lceil r_2/2 \rceil\}, \mathbf{x}, -\mathbf{x}.$$

For the second hidden layer, there are  $2 + r - (\lceil r_1/2 \rceil + \lceil r_2/2 \rceil) + 2m_1$  hidden neurons. The first neuron

$$\eta_1 = \sum_{i=1}^{\lceil r_1/2 \rceil} c_i^+ \sigma((\mathbf{w}_i^+)^T \mathbf{x} + b_i^+) / \sum_{i=1}^{\lceil r_1/2 \rceil} c_i^+,$$

the second neuron

$$\eta_2 = \sum_{i=1}^{\lceil r_2/2 \rceil} c_i^- \sigma((\mathbf{w}_i^-)^T \mathbf{x} + b_i^-) / \sum_{i=1}^{\lceil r_2/2 \rceil} c_i^-,$$

then follows  $\sigma \circ \mathbf{x}$ ,  $\sigma \circ (-\mathbf{x})$  and the left  $r - (\lceil r_1/2 \rceil + \lceil r_2/2 \rceil)$  hidden neurons

$$\{\eta_i^+ = (\mathbf{w}_i^+)^T \sigma \circ \mathbf{x} - (\mathbf{w}_i^+)^T \sigma \circ (-\mathbf{x}) + b_i^+ : i = \lceil r_1/2 \rceil + 1, \dots, r_1\},$$

$$\{\eta_i^- = (\mathbf{w}_i^-)^T \sigma \circ \mathbf{x} - (\mathbf{w}_i^-)^T \sigma \circ (-\mathbf{x}) + b_i^- : i = \lceil r_2/2 \rceil + 1, \dots, r_2\}.$$

The output layer only contains two hidden neurons  $(g_+, g_-)$ , which could be computed respectively by

$$\frac{\sum_{i=1}^{\lceil r_1/2 \rceil} c_i^+}{\sum_{i=1}^{r_1} c_i^+} \sigma(\eta_1) + \sum_{i=\lceil r_1/2 \rceil+1}^{r_1} \frac{c_i^+}{\sum_{i=1}^{r_1} c_i^+} \sigma(\eta_i^+) \quad \text{and} \quad \frac{\sum_{i=1}^{\lceil r_2/2 \rceil} c_i^-}{\sum_{i=1}^{r_2} c_i^-} \sigma(\eta_2) + \sum_{i=\lceil r_2/2 \rceil+1}^{r_2} \frac{c_i^-}{\sum_{i=1}^{r_2} c_i^-} \sigma(\eta_i^-).$$

Thus, we find a neural network in  $\mathcal{N}_{1,\infty,1,c_o}^{2,\mathbf{d}}$  representing  $(g_+, g_-)$ , where  $d_i \leq \lceil r_1/2 \rceil + \lceil r_2/2 \rceil + 2m_1 + 2$ .

When  $k = K$ , define  $r_1^* = (K-1)[r_1/K]$ ,  $r_2^* = (K-1)[r_2/K]$ ,  $r^* = r_1 + r_2$  and

$$g^*(\mathbf{x}) = (g_+^*(\mathbf{x}), g_-^*(\mathbf{x})) = \left( \frac{1}{\sum_{i=1}^{r_1^*} c_i^+} \sum_{i=1}^{r_1^*} c_i^+ \sigma((\mathbf{w}_i^+)^T \mathbf{x} + b_i^+), \frac{1}{\sum_{i=1}^{r_2^*} c_i^-} \sum_{i=1}^{r_2^*} c_i^- \sigma((\mathbf{w}_i^-)^T \mathbf{x} + b_i^-) \right).$$

By induction assumption,  $g^*$  could be represented  $h^* \in \mathcal{N}_{1,\infty,1,1}^{K-1, \mathbf{d}^*}$ , where  $d_i^* \leq [r_1^*/(K-1)] + [r_2^*/(K-1)] + 2m_1 + 2$ . In order to construct a WN-DNN representing  $(g_+, g_-)$ , we keep the first  $K-1$  hidden layers of  $h^*$  and build the  $K$ th hidden layer based on the output layer of  $h^*$ . Since the  $(K-1)$ th hidden layer contains both  $\sigma \circ \mathbf{x}$  and  $\sigma \circ (-\mathbf{x})$ . Thus except the original two neurons, we could add

$$\{(\mathbf{w}_i^+)^T(\sigma \circ \mathbf{x} - \sigma \circ (-\mathbf{x})) + b_i^+ : i = r_1^* + 1, \dots, r_1\},$$

$$\{(\mathbf{w}_i^-)^T(\sigma \circ \mathbf{x} - \sigma \circ (-\mathbf{x})) + b_i^- : i = r_2^* + 1, \dots, r_2\}, \sigma \circ \mathbf{x}, \sigma \circ (-\mathbf{x})$$

to the  $K$ th hidden layer. Note that  $\|(b_i, 2\mathbf{w}_i^T)\|_1 = 1$ , thus we does not increase the  $L_{1,\infty}$  norm of the  $K$ th transformation by adding these neurons.

We finally construct the output layer by

$$\frac{\sum_{i=1}^{r_1^*} c_i^+}{\sum_{i=1}^{r_1} c_i^+} \sigma(g_+^*(\mathbf{x})) + \sum_{i=r_1^*+1}^{r_1} \frac{c_i^+}{\sum_{i=1}^{r_1} c_i^+} \sigma((\mathbf{w}_i^+)^T \mathbf{x} + b_i^+),$$

$$\frac{\sum_{i=1}^{r_2^*} c_i^-}{\sum_{i=1}^{r_2} c_i^-} \sigma(g_-^*(\mathbf{x})) + \sum_{i=r_2^*+1}^{r_2} \frac{c_i^-}{\sum_{i=1}^{r_2} c_i^-} \sigma((\mathbf{w}_i^-)^T \mathbf{x} + b_i^-).$$

Thus, we build a neural network in  $\mathcal{N}_{1,\infty,1,1}^{K, \mathbf{d}}$  representing  $(g_+, g_-)$ . The width of the  $i$ th hidden layer  $d_i \leq [r_1/K] + [r_2/K] + 2m_1 + 3$ .  $\square$

## F.2 Proof for Theorem 2

*Proof.* Assume  $f$  is an arbitrary function defined on  $\mathbb{R}^{m_1} \rightarrow \mathbb{R}$ , satisfying that  $\|\mathbf{x}_1\|_\infty \leq 1$ ,  $\|\mathbf{x}_2\|_\infty \leq 1$ ,  $f(\mathbf{x}_1) \leq L$  and  $|f(\mathbf{x}_1) - f(\mathbf{x}_2)| \leq L \|\mathbf{x}_1 - \mathbf{x}_2\|_\infty$ . Following [3, Propositions 1 & 6], for  $c_o$  greater than a constant depending only on  $m_1$ , a fixed  $\gamma > 0$ , there exists some function  $h(\mathbf{x}) : \mathbb{R}^{m_1} \rightarrow \mathbb{R} = \sum_{i=1}^r c_i \sigma(\mathbf{w}_i^T \mathbf{x} + b_i)$ , satisfying that  $\sum_{i=1}^r |c_i| \leq c_o$ ,  $\|(b_i, \mathbf{w}_i^T)\|_1 = 1$  and  $r \leq c_2(m_1) \gamma^{-\frac{2(m_1+1)}{m_1+4}}$ , such that

$$\sup_{\|\mathbf{x}\|_\infty \leq 1} |f(\mathbf{x}) - h(\mathbf{x})| \leq c_o \gamma + c_1(m_1) L \left(\frac{c_o}{L}\right)^{-\frac{2}{m_1+1}} \log \frac{c_o}{L},$$

where  $c_1(m_1)$  and  $c_2(m_1)$  are some constants depending only on  $m_1$ .

By taking  $\gamma = c_1(m_1)(c_o/L)^{-1-2/(m_1+1)} \log \frac{c_o}{L}$ , we have some function  $h(\mathbf{x}) = \sum_{i=1}^r c_i \sigma(\mathbf{w}_i^T \mathbf{x} + b_i)$ , satisfying that  $\sum_{i=1}^r |c_i| \leq c_o$ ,  $\|(b_i, 2\mathbf{w}_i^T)\|_1 = 1$  and

$$r \leq C_r(m_1) \left(\log \frac{c_o}{L}\right)^{-2(m_1+1)/(m_1+4)} \left(\frac{c_o}{L}\right)^{2(m_1+3)/(m_1+4)},$$

such that

$$\sup_{\|\mathbf{x}\|_\infty \leq 1} |f(\mathbf{x}) - h(\mathbf{x})| \leq C(m_1) L \left(\frac{c_o}{L}\right)^{-\frac{2}{m_1+1}} \log \frac{c_o}{L},$$

where  $C_r(m_1)$  and  $C(m_1)$  denote some constants that depend only on  $m_1$ .

By Lemma 1, for any integer  $k \in [1, r]$ , this  $h$  could be represented by a neural network in  $\mathcal{N}_{p,\infty,1,c_o}^k, \mathbf{d}^k$ , where  $\mathbf{d}_0^k = m_1$ ,  $\mathbf{d}_i^k = \lceil r/k \rceil + 2m_1 + 3$  for  $i = 1, \dots, k$  and  $\mathbf{d}_{k+1}^k = 1$ .  $\square$
